# Supplementary material for: Objective and subjective evaluation of effectiveness of Cochlear sparing in Highly conformal head and neck radiotherapy
Source: Research Square preprint supplement (doi:10.21203/rs.3.rs-7861120/v1), 2025-11-04
Supplement: Supplementary file 1 [file 17619707282de77959420787.xlsx]

## Sheet: GEE_copy
1_Study_number	4_Hospital_number	I_Dmin_1	I_Dmin		I_Dmax	I_Dmean_2	I_Dmean_1	I_Dmean	time	Side	I_PTA_B	I_PTA_B_code	I_PTA_3	I_PTA_3_code	I_PTA_Change	I_Degree_of_hearing	I_hearing_loss_code	C_Dmin	C_Dmax	C_Dmean_1	C_Dmean_2	C_Dmean	Side	C_PTA_B	C_PTA_3	C_PTA_Change	Degree_of_hearing	C_hearing_loss_code	Side	106_Low_frequency_Left_B	107_Mid_frequency__Left_B	108_High_Frequency_Left_B	109_Low_frequency_Left_3	110_Mid_frequency_Left_3	111_High_Frequency_Left_3	I_Low_change	I_low_code	I_Mid_change	I_mid_code	aaa	I_high_code	I_High_change	Side	106_Low_frequency_Left_B	107_Mid_frequency__Left_B	108_High_Frequency_Left_B	109_Low_frequency_Left_3	110_Mid_frequency_Left_3	111_High_Frequency_Left_3
1	838037H	39.8	36-40 Gy		41-45 Gy	45	45	41-45 Gy	0	Ipsilateral	Normal	0	Normal	1	0	No hearing loss	0	11-15 Gy	16-20 Gy	14.5	14.5	11-15 Gy	Contralateral	Normal	Normal	0	No hearing loss	0	Ipsilateral	Absent	Present	Absent	Absent	Present	Absent	0	0	0	1	0	1	0	Contralateral	Absent	Present	Absent	Absent	Present	Absent
2	830541H	30.2	31-35 Gy		41-45 Gy	41.6	41.6	41-45 Gy	0	Ipsilateral	Normal	0	Normal	0	0	No hearing loss	0	6-10 Gy	6-10 Gy	5.8	5.8	6-10 Gy	Contralateral	Normal	Normal	0	No hearing loss	0	Ipsilateral	Absent	Present	Absent	Absent	Present	Absent	0	0	0	1	0	0	0	Contralateral	Present	Present	Present	Present	Present	Present
3	892928h	22.4	21-25 Gy		41-45 Gy	32.8	32.8	31-35 Gy	0	Ipsilateral	Normal	0	Normal	0	0	No hearing loss	0	31-35 Gy	21-25 Gy	42.9	42.9	41-45 Gy	Contralateral	Normal	Normal	0	No hearing loss	0	Ipsilateral	Present	Present	Present	Present	Present	Present	0	1	0	1	0	1	0	Contralateral	Present	Present	Present	Present	Present	Present
4	889734H	35.7	36-40 Gy		41-45 Gy	39.6	39.6	36-40 Gy	0	Ipsilateral	Normal	0	Conductive	1	0	Mild	1	26-30 Gy	31-35 Gy	29.5	29.5	26-30 Gy	Contralateral	Normal	Conductive	0	Mild	1	Ipsilateral	Absent	Absent	Absent	Absent	Absent	Absent	0	0	0	0	0	0	0	Contralateral	Absent	Absent	Absent	Absent	Absent	Absent
5	182262A	5.4	6-10 Gy		16-20 Gy	10.5	10.5	11-15 Gy	0	Ipsilateral	Normal	0	Mixed	2	0	Mild	1	<5 Gy	6-10 Gy	4.6	4.6	<5 Gy	Contralateral	Normal	Mixed	0	Moderate	2	Ipsilateral	Absent	Absent	Absent	Absent	Absent	Absent	0	0	0	0	0	0	0	Contralateral	Absent	Absent	Absent	Absent	Absent	Absent
6	894251H	4.5	<5 Gy		6-10 Gy	6.2	6.2	6-10 Gy	0	Ipsilateral	Normal	0	Normal	0	0	No hearing loss	0	6-10 Gy	16-20 Gy	12.2	12.2	11-15 Gy	Contralateral	Normal	Normal	0	No hearing loss	0	Ipsilateral	Absent	Absent	Absent	Absent	Absent	Absent	0	0	0	0	0	0	0	Contralateral	Absent	Absent	Absent	Absent	Absent	Absent
7	970914C	42.3	41-45 Gy		41-45 Gy	44.7	44.7	41-45 Gy	0	Ipsilateral	Normal	0	Mixed	2	0	Moderate	2	11-15 Gy	16-20 Gy	15.2	15.2	16-20 Gy	Contralateral	Normal	Normal	0	No hearing loss	0	Ipsilateral	Absent	Absent	Absent	Absent	Absent	Absent	0	0	0	0	0	0	0	Contralateral	Present	Present	Present	Absent	Absent	Absent
8	897231H	37.3	36-40 Gy		41-45 Gy	44.8	44.8	41-45 Gy	0	Ipsilateral	Normal	0	Conductive	1	0	Moderate	2	21-25 Gy	26-30 Gy	25	25	26-30 Gy	Contralateral	Normal	Normal	0	No hearing loss	0	Ipsilateral	Absent	Absent	Absent	Absent	Absent	Absent	0	0	0	0	0	0	0	Contralateral	Absent	Absent	Absent	Absent	Absent	Absent
9	955832H	11.3	11-15 Gy		21-25 Gy	16.6	16.6	16-20 Gy	0	Ipsilateral	Normal	0	Normal	0	0	No hearing loss	0	11-15 Gy	26-30 Gy	19.4	19.4	16-20 Gy	Contralateral	Normal	Normal	0	No hearing loss	0	Ipsilateral	Present	Present	Present	Present	Present	Present	0	1	0	1	0	1	0	Contralateral	Absent	Absent	Absent	Absent	Absent	Absent
10	238875G	29.7	26-30 Gy		36-40 Gy	34.7	34.7	31-35 Gy	0	Ipsilateral	Normal	0	Normal	0	0	No hearing loss	0	11-15 Gy	11-15 Gy	11.6	11.6	11-15 Gy	Contralateral	Normal	Normal	0	No hearing loss	0	Ipsilateral	Present	Present	Present	Present	Present	Present	0	1	0	1	0	1	0	Contralateral	Present	Present	Present	Present	Present	Present
11	233805B	17.9	16-20 Gy		21-25 Gy	20.5	20.5	21-25 Gy	0	Ipsilateral	Normal	0	Normal	0	0	No hearing loss	0	11-15 Gy	16-20 Gy	13.7	13.7	11-15 Gy	Contralateral	Normal	Normal	0	No hearing loss	0	Ipsilateral	Absent	Absent	Absent	Absent	Absent	Absent	0	0	0	0	0	0	0	Contralateral	Absent	Present	Absent	Absent	Absent	Absent
12	231380G	6.1	6-10 Gy		6-10 Gy	6.9	6.9	6-10 Gy	0	Ipsilateral	Normal	0	Conductive	1	0	Mild	1	6-10 Gy	11-15 Gy	8.9	8.9	6-10 Gy	Contralateral	Normal	Normal	0	No hearing loss	0	Ipsilateral	Absent	Absent	Absent	Absent	Absent	Absent	0	0	0	0	0	0	0	Contralateral	Present	Present	Present	Present	Present	Present
13	022834D	12.7	11-15 Gy		31-35 Gy	21.2	21.2	21-25 Gy	0	Ipsilateral	Normal	0	Mixed	2	0	Severe	3	11-15 Gy	11-15 Gy	12.8	12.8	11-15 Gy	Contralateral	Normal	Mixed	0	Moderately severe	3	Ipsilateral	Present	Present	Present	Absent	Absent	Absent	1	1	1	1	1	1	1	Contralateral	Absent	Absent	Absent	Absent	Absent	Absent
14	959326H	40	41-45 Gy		41-45 Gy	42.5	42.5	41-45 Gy	0	Ipsilateral	Normal	0	Normal	0	0	No hearing loss	0	16-20 Gy	21-25 Gy	21.1	21.1	21-25 Gy	Contralateral	Normal	Normal	0	No hearing loss	0	Ipsilateral	Present	Present	Present	Present	Present	Present	0	1	0	1	0	1	0	Contralateral	Present	Present	Present	Present	Present	Present
15	956015H	15.5	16-20 Gy		26-30 Gy	20.4	20.4	21-25 Gy	0	Ipsilateral	Normal	0	Normal	0	0	No hearing loss	0	11-15 Gy	16-20 Gy	15.4	15.4	16-20 Gy	Contralateral	Normal	Normal	0	No hearing loss	0	Ipsilateral	Absent	Absent	Absent	Absent	Absent	Absent	0	0	0	0	0	0	0	Contralateral	Present	Present	Absent	Present	Present	Absent
16	964001h	4.8	<5 Gy		6-10 Gy	5.5	5.5	6-10 Gy	0	Ipsilateral	Normal	0	Normal	0	0	No hearing loss	0	<5 Gy	6-10 Gy	4.43	4.43	<5 Gy	Contralateral	Normal	Normal	0	No hearing loss	0	Ipsilateral	Present	Present	Present	Present	Present	Present	0	1	0	1	0	1	0	Contralateral	Present	Present	Present	Present	Present	Present
17	954611h	5.5	6-10 Gy		11-15 Gy	8.8	8.8	6-10 Gy	0	Ipsilateral	Normal	0	Normal	0	0	No hearing loss	0	11-15 Gy	31-35 Gy	20.1	20.1	21-25 Gy	Contralateral	Normal	Normal	0	No hearing loss	0	Ipsilateral	Present	Present	Present	Present	Present	Present	0	1	0	1	0	1	0	Contralateral	Absent	Absent	Present	Absent	Absent	Present
18	956167h	23.2	21-25 Gy		26-30 Gy	24.7	24.7	21-25 Gy	0	Ipsilateral	Normal	0	Mixed	2	0	Moderate	2	31-35 Gy	41-45 Gy	38.4	38.4	36-40 Gy	Contralateral	Normal	Sensorineural	0	Mild	1	Ipsilateral	Absent	Absent	Absent	Absent	Absent	Absent	0	0	0	0	0	0	0	Contralateral	Absent	Absent	Absent	Absent	Absent	Absent
19	888292H	12.5	11-15 Gy		26-30 Gy	18.8	18.8	16-20 Gy	0	Ipsilateral	Normal	0	Mixed	2	0	Moderate	2	26-30 Gy	41-45 Gy	34.2	34.2	31-35 Gy	Contralateral	Normal	Mixed	0	Moderate	2	Ipsilateral	Present	Present	Present	Present	Present	Present	0	1	0	1	0	1	0	Contralateral	Absent	Present	Absent	Absent	Present	Absent
20	965660H	2.5	<5 Gy		<5 Gy	2.9	2.9	<5 Gy	0	Ipsilateral	Normal	0	Normal	0	0	No hearing loss	0	<5 Gy	<5 Gy	2.8	2.8	<5 Gy	Contralateral	Normal	Normal	0	No hearing loss	0	Ipsilateral	Present	Present	Present	Present	Present	Present	0	1	0	1	0	1	0	Contralateral	Present	Present	Present	Present	Present	Present
21	956015H	15.5	16-20 Gy		26-30 Gy	20.4	20.4	21-25 Gy	0	Ipsilateral	Normal	0	Normal	0	0	No hearing loss	0	11-15 Gy	16-20 Gy	15.4	15.4	16-20 Gy	Contralateral	Normal	Normal	0	No hearing loss	0	Ipsilateral	Absent	Absent	Absent	Absent	Absent	Absent	0	0	0	0	0	0	0	Contralateral	Present	Present	Absent	Present	Present	Absent
22	856176H	24.5	21-25 Gy		36-40 Gy	28.4	28.4	26-30 Gy	0	Ipsilateral	Normal	0	Normal	0	0	No hearing loss	0	21-25 Gy	26-30 Gy	23.7	23.7	21-25 Gy	Contralateral	Normal	Normal	0	No hearing loss	0	Ipsilateral	Absent	Absent	Absent	Absent	Absent	Absent	0	0	0	0	0	0	0	Contralateral	Absent	Absent	Absent	Absent	Absent	Absent
23	959819h	37.8	36-40 Gy		41-45 Gy	41.9	41.9	41-45 Gy	0	Ipsilateral	Normal	0	Sensorineural	3	0	Moderate	2	16-20 Gy	26-30 Gy	20.7	20.7	21-25 Gy	Contralateral	Normal	Sensorineural	0	Mild	1	Ipsilateral	Absent	Absent	Absent	Absent	Absent	Absent	0	0	0	0	0	0	0	Contralateral	Absent	Absent	Absent	Absent	Absent	Absent
24	013144p	2.6	<5 Gy		<5 Gy	3.2	3.2	<5 Gy	0	Ipsilateral	Normal	0	Normal	0	0	No hearing loss	0	<5 Gy	<5 Gy	3.3	3.3	<5 Gy	Contralateral	Normal	Normal	0	No hearing loss	0	Ipsilateral	Absent	Absent	Absent	Absent	Absent	Absent	0	0	0	0	0	0	0	Contralateral	Absent	Present	Absent	Absent	Present	Absent
25	003218p	35.9	36-40 Gy		41-45 Gy	42	42	41-45 Gy	0	Ipsilateral	Normal	0	Mixed	2	0	Moderate	2	21-25 Gy	21-25 Gy	21.5	21.5	21-25 Gy	Contralateral	Normal	Normal	0	No hearing loss	0	Ipsilateral	Absent	Absent	Absent	Absent	Absent	Absent	0	0	0	0	0	0	0	Contralateral	Absent	Absent	Absent	Absent	Absent	Absent
26	021346p	11.3	11-15 Gy		26-30 Gy	17.9	17.9	16-20 Gy	0	Ipsilateral	Normal	0	Mixed	2	0	Severe	3	11-15 Gy	26-30 Gy	19.4	19.4	16-20 Gy	Contralateral	Normal	Normal	0	No hearing loss	0	Ipsilateral	Absent	Absent	Absent	Absent	Absent	Absent	0	0	0	0	0	0	0	Contralateral	Absent	Absent	Absent	Absent	Absent	Absent
27	958482h	35.6	36-40 Gy		41-45 Gy	40.6	40.6	41-45 Gy	0	Ipsilateral	Normal	0	Mixed	2	0	Moderate	2	16-20 Gy	21-25 Gy	18.1	18.1	16-20 Gy	Contralateral	Normal	Normal	0	No hearing loss	0	Ipsilateral	Absent	Absent	Absent	Absent	Absent	Absent	0	0	0	0	0	0	0	Contralateral	Absent	Absent	Absent	Absent	Absent	Absent
28	011870p	7.6	6-10 Gy		21-25 Gy	13.2	13.2	11-15 Gy	0	Ipsilateral	Normal	0	Normal	0	0	No hearing loss	0	6-10 Gy	26-30 Gy	16.1	16.1	16-20 Gy	Contralateral	Normal	Normal	0	No hearing loss	0	Ipsilateral	Present	Present	Present	Present	Present	Present	0	1	0	1	0	1	0	Contralateral	Present	Present	Present	Present	Present	Present
29	923367h	14.9	11-15 Gy		31-35 Gy	20.6	20.6	21-25 Gy	0	Ipsilateral	Normal	0	Normal	0	0	No hearing loss	0	6-10 Gy	6-10 Gy	7.8	7.8	6-10 Gy	Contralateral	Normal	Normal	0	No hearing loss	0	Ipsilateral	Absent	Absent	Absent	Absent	Absent	Absent	0	0	0	0	0	0	0	Contralateral	Absent	Absent	Present	Present	Present	Present
1	838037H	39.8	36-40 Gy		41-45 Gy		45	41-45 Gy	1		Normal	1			0					14.5						0											0		1		0
2	830541H	30.2	31-35 Gy		41-45 Gy		41.6	41-45 Gy	1		Normal	0			0					5.8						0											0		1		0
3	892928h	22.4	21-25 Gy		41-45 Gy		32.8	31-35 Gy	1		Normal	0			0					42.9						0											1		1		1
4	889734H	35.7	36-40 Gy		41-45 Gy		39.6	36-40 Gy	1		Conductive	1			1					29.5						1											0		0		0
5	182262A	5.4	6-10 Gy		16-20 Gy		10.5	11-15 Gy	1		Mixed	2			1					4.6						1											0		0		0
6	894251H	4.5	<5 Gy		6-10 Gy		6.2	6-10 Gy	1		Normal	0			0					12.2						0											0		0		0
7	970914C	42.3	41-45 Gy		41-45 Gy		44.7	41-45 Gy	1		Mixed	2			1					15.2						0											0		0		0
8	897231H	37.3	36-40 Gy		41-45 Gy		44.8	41-45 Gy	1		Conductive	1			1					25						0											0		0		0
9	955832H	11.3	11-15 Gy		21-25 Gy		16.6	16-20 Gy	1		Normal	0			0					19.4						0											1		1		1
10	238875G	29.7	26-30 Gy		36-40 Gy		34.7	31-35 Gy	1		Normal	0			0					11.6						0											1		1		1
11	233805B	17.9	16-20 Gy		21-25 Gy		20.5	21-25 Gy	1		Normal	0			0					13.7						0											0		0		0
12	231380G	6.1	6-10 Gy		6-10 Gy		6.9	6-10 Gy	1		Conductive	1			1					8.9						0											0		0		0
13	022834D	12.7	11-15 Gy		31-35 Gy		21.2	21-25 Gy	1		Mixed	2			1					12.8						1											0		0		0
14	959326H	40	41-45 Gy		41-45 Gy		42.5	41-45 Gy	1		Normal	0			0					21.1						0											1		1		1
15	956015H	15.5	16-20 Gy		26-30 Gy		20.4	21-25 Gy	1		Normal	0			0					15.4						0											0		0		0
16	964001h	4.8	<5 Gy		6-10 Gy		5.5	6-10 Gy	1		Normal	0			0					4.43						0											1		1		1
17	954611h	5.5	6-10 Gy		11-15 Gy		8.8	6-10 Gy	1		Normal	0			0					20.1						0											1		1		1
18	956167h	23.2	21-25 Gy		26-30 Gy		24.7	21-25 Gy	1		Mixed	2			1					38.4						1											0		0		0
19	888292H	12.5	11-15 Gy		26-30 Gy		18.8	16-20 Gy	1		Mixed	2			1					34.2						1											1		1		1
20	965660H	2.5	<5 Gy		<5 Gy		2.9	<5 Gy	1		Normal	0			0					2.8						0											1		1		1
21	956015H	15.5	16-20 Gy		26-30 Gy		20.4	21-25 Gy	1		Normal	0			0					15.4						0											0		0		0
22	856176H	24.5	21-25 Gy		36-40 Gy		28.4	26-30 Gy	1		Normal	0			0					23.7						0											0		0		0
23	959819h	37.8	36-40 Gy		41-45 Gy		41.9	41-45 Gy	1		Sensorineural	3			1					20.7						1											0		0		0
24	013144p	2.6	<5 Gy		<5 Gy		3.2	<5 Gy	1		Normal	0			0					3.3						0											0		0		0
25	003218p	35.9	36-40 Gy		41-45 Gy		42	41-45 Gy	1		Mixed	2			1					21.5						0											0		0		0
26	021346p	11.3	11-15 Gy		26-30 Gy		17.9	16-20 Gy	1		Mixed	2			1					19.4						0											0		0		0
27	958482h	35.6	36-40 Gy		41-45 Gy		40.6	41-45 Gy	1		Mixed	2			1					18.1						0											0		0		0
28	011870p	7.6	6-10 Gy		21-25 Gy		13.2	11-15 Gy	1		Normal	0			0					16.1						0											1		1		1
29	923367h	14.9	11-15 Gy		31-35 Gy		20.6	21-25 Gy	1		Normal	0			0					7.8						0											0		0		0
[truncated: 19 more columns]

## Sheet: updated_Raw
1_Study_number	3_Name	4_Hospital_number	5_Age	Age group	6_Sex	7_Weight	8_Height	BMI	side	Education	Occupation	11_Phone_number	Address	14_Histopath	15_site	16_Other_site	17_Initial_T_stage	Initial_N_staging	Stage_group	Prior_oncological	21_Surgical_T_stage	Surgical_N_staging	Surgical_Stage	25_Dose_to_the_PTV	25_Dose_to_the_PTV	Dmin	Dmax	Mean	median	26_Dose_to_the_Left_	Group left cochlea	27_Dose_to_the_Right	Group right cochlea	29_Social_score_at_B	30_Social_score_at_3	31_Social_score_at_6	32_Emotional_score_B	33_Emotional_score_3	34_Emotional_score_6	35_Total_score_at_B	36_Total_score_at_3_	37_Total_score_at_6	38_QOL_group_at_base	39_QOL_group_at_3_mo	40_QOL_group_at_6_mo	42_Left_ear_at_basel	44_Left_ear_at_3_mon	43_Right_ear_at_base	46_Right_ear_at_3_mo
1	MD Abu selim	798175h	53	51-60	Male	74	159		Left	Graduate or postgraduate	Professional (white collar)	9566392936	Bangladesh	Mucoepidermoid	Parotid		2	N0	II	WLE	2	N0	II	60	60	44.4	66.5	60.9	61.5	37.6	36-40 Gy	9.4	6-10 Gy	0	8	6	0	6	4	0	14	10	No handicap	Mild-moderate handicap	Mild-moderate handicap	Absent		Absent
2	Irfan haider	838037H	41	41-50	Male	74	160		Right	Graduate or postgraduate	Semi-professional	9334709541	Jharkhand	Squamous cell carcinoma	Parotid		2	N0	II	WLE	2	N0	II	60	60	46	66.3	61.6	61.7	14	11-15 Gy	45	41-45 Gy	0	0	0	0	0	0	0	0	0	No handicap	No handicap	No handicap	Absent	Absent	Absent	Absent
3	Rahul barman	804470H	37	30-40	Male	70	168		Right	High school certificate	Skilled worker	963088445	Chhattisgarh	SCC	oral cavity		2	N0	II	WLE + MRND	2	N1	III	60	60	44.4	65.4	61	61.3	40.1	41-45 Gy	14.8	11-15 Gy	0			0			0			No handicap			Absent		Absent
4	Siva Naga prakash	830541H	28	17-30	Male	78	175		Left	Graduate or postgraduate	Professional (white collar)	8592011645	Chennai	Mucoepidermoid	Parotid		1	N1	I	WLE + SLND	4	N2b	IV	66	66	46	66.3	61.6	61.4	41.6	41-45 Gy	6.07	6-10 Gy	0	0	0	0	0	0	0	0	0	No handicap	No handicap	No handicap	Absent	Absent	Absent	Absent
5	Raveendran	892928h	55	51-60	Male	75	164		Right	Graduate or postgraduate	Professional (white collar)	9751669630	Tamil nadu	SCC	oral cavity		3	N2c	IV	WLE + MRND	3	N2c	IV	60	60	43.7	66.4	61	61.3	11.4	11-15 Gy	7.5	6-10 Gy	0	0	0	0	0	0	0	0	0	No handicap	No handicap	No handicap	Absent	Absent	Absent	Absent
6	Veeramani	888292H	66	61-70	Male	63	168		Right	Intermediate or post high school diploma	Clerical, shop-owner/farm	9488205566	Tamil nadu	SCC	oral cavity		2	N1	III	WLE + MRND	2	N1	III	60	60	46	66.4	60.9	61.2	34.2	31-35 Gy	18.8	16-20 Gy	0			0			0			No handicap			Absent		Absent
7	Jayachandra	889734H	63	61-70	Male	67	164		Left	Graduate or postgraduate	Semi-professional	9902279866	TAMIL NADU	SCC	Sinonasal		4	N2a	IV	WLE + SLND	4	N0	III	60	60	43.7	68.3	61.1	61.1	39.6	36-40 Gy	27.7	26-30 Gy	0	4	4	0	4	2	0	8	6	No handicap	No handicap	No handicap	Absent	Absent	Absent	Absent
8	Kalavathy	182262A	69	61-70	Female	52	147		Right	High school certificate	Unemployed	8098656304	Tamil nadu	SCC	oral cavity		4	N2c	IV	WLE + SLND	4	N0	IV	60	60	47.8	66.4	60.5	60.6	45	41-45 Gy	10.5	11-15 Gy	0	8	8	0	4	2	0	12	10	No handicap	Mild-moderate handicap	Mild-moderate handicap	Absent	Absent	Absent	Absent
9	Santosh keshri	894251H	48	41-50	Male	76	178		Right	High school certificate	Skilled worker	6203026212	Bihar	SCC	oral cavity		3	N1	III	WLE + SND	3	N2b	III	60	60	46.8	65.7	60.6	60.7	12.2	11-15 Gy	6.25	6-10 Gy	0	0	0	0	0	0	0	0	0	No handicap	No handicap	No handicap	Absent	Absent	Absent	Absent
10	Poomoni sulochana	970914C	57	51-60	Female	55	145		Right	High school certificate	Unemployed	8760017162	Tamil Nadu	SCC	Sinonasal		3	N2b	IV	WLE + MRND	3	N2b	IV	66	60	27.3	66.6	61.2	61.6	15.2	16-20 Gy	44.7	41-45 Gy	0	4		0	6		0	10		No handicap	Mild-moderate handicap		Absent	Absent	Absent	Absent
11	Ramakant Tiwari	897231H	54	51-60	Male	60	174		Left	Intermediate or post high school diploma	Skilled worker	626660675	Chhattisgarh	SCC	oral cavity		4	N0	IV	WLE + MRND	4	N0	IV	66	66	41.2	66.5	61.1	61.2	44.8	41-45 Gy	24.1	21-25 Gy	0	2	2	0	2	2	0	4	4	No handicap	No handicap	No handicap	Absent	Absent	Absent	Absent
12	Vijayan	513810B	54	51-60	Male	70	170		Right	Graduate or postgraduate	Professional (white collar)	9488889022	Tamil Nadu	SCC	oral cavity		4	N2b	IV	WLE + SLND	4	N2b	IV	60	60	38.2	66.3	58.8	60.2	10.2	11-15 Gy	17.3	16-20 Gy	0	0		0	0		0	0		No handicap	No handicap		Absent		Absent
13	Manimegalai	955832H	51	51-60	Male	75	152		Left	Graduate or postgraduate	Professional (white collar)	9443005787	Tamil Nadu	SCC	oral cavity		2	N0	II	WLE + SND	3	N0	III	60	60	41.2	66.6	61	61.1	16.6	16-20 Gy	19.4	16-20 Gy	0	0	0	0	0	0	0	0	0	No handicap	No handicap	No handicap	Absent	Absent	Absent	Absent
14	Anil Kumar	238875G	46	41-50	Male	88	182		Right	Graduate or postgraduate	Clerical, shop-owner/farm	8220861761	Jharkhand	SCC	oral cavity		4	N0	IV	WLE	4	N0	IV	60	60	27.5	66.8	60.5	60.8	20.3	21-25 Gy	9	6-10 Gy	0	0	0	0	0	0	0	0	0	No handicap	No handicap	No handicap	Absent	Absent	Absent	Absent
15	Rajendra prasad	233805B	59	51-60	Male	85	173		Left	Intermediate or post high school diploma	Clerical, shop-owner/farm		Andhra Pradesh	Clear cell carcinoma	Sinonasal		3	N0	III	WLE	3	N0	III	66	66	42	67.6	60.2	60.4	35.4	36-40 Gy	29.2	26-30 Gy	0	0	0	0	0	0	0	0	0	No handicap	No handicap	No handicap	Absent	Absent	Absent	Absent
16	MD shamim akter	231380G	46	41-50	Male	55	175		Left	Intermediate or post high school diploma	Clerical, shop-owner/farm	6203015438	West bengal	SCC	Orophraynx		3	N0	III	WLE	3	Nx	III	60	60	46.4	64.1	60.2	60.6	6.9	6-10 Gy	8.9	6-10 Gy	0	0	0	0	0	0	0	0	0	No handicap	No handicap	No handicap	Absent	Absent	Absent	Absent
17	Rosa	022834D	67	61-70	Female	46	155		Right	Intermediate or post high school diploma	Unemployed	9436100616	Meghalaya	SCC	hypophraynx		4	N3b	IV	Radical RT	4	N3b	IV	70	70	52	76.5	71.2	71.5	12.8	11-15 Gy	21.2	21-25 Gy	0	8	8	0	4	4	0	12	12	No handicap	Mild-moderate handicap	Mild-moderate handicap	Absent	Absent	Absent	Absent
18	Kancharla Srinivas roa	894341H	38	30-40	Male	80	160		Right	Intermediate or post high school diploma	Clerical, shop-owner/farm	9704266121	Andhra Pradesh	SCC	oral cavity		3	N3b	IV	WLE + MRND	3	N1	III	60	60	41.2	66.7	60.9	61.1	32.1	31-35 Gy	35.8	36-40 Gy	0	10	10	0	10	10	0	20	20	No handicap	Mild-moderate handicap	Mild-moderate handicap	Absent		Absent
19	MD bozlur	967021H	45	41-50	Male	69	162		Right	Graduate or postgraduate	Semi-professional	7477790109	Bangladesh	ACC	Sinonasal		unknown	N0	unknown	FESS (outside)				60	60	27.3	66.7	60.5	60.7	22.1	21-25 Gy	27.3	26-30 Gy	0	6	6	0	6	8	0	12	14	No handicap	Mild-moderate handicap		Absent		Absent
20	Paneerselvam	107567B	67	61-70	Male	102	183		Left	Intermediate or post high school diploma			Tamil nadu	SCC	oral cavity		4	N0	IV	WLE + MRND	4	N0	IV	60	60	41	66.5	60.6	60.8	38.7	36-40 Gy	23	21-25 Gy	0			0			0			No handicap			Absent		Absent
21	Suvankar santa	959326H	27	17-30	Male	53	168		Right	Intermediate or post high school diploma	Clerical, shop-owner/farm	7364918305	West bengal	Clear cell ca	Maxilla		4	N0	IV	WLE	4	Nx	IV	66	66	27.3	21.9	67.6	67.8	20.7	21-25 Gy	42.5	41-45 Gy	0	0	0	0	0	0	0	0	0	No handicap	No handicap	No handicap	Absent	Absent	Absent	Absent
22	Sofanath	956015H	43	41-50	Male	73	162		Right	Graduate or postgraduate	Professional (white collar)	629703395	West bengal	Mucoepidermal ca	oral cavity		4	N0	IV	WLE + SND	4	N0	IV	60	60	49.4	67.4	60.6	60.6	15.4	16-20 Gy	20.4	21-25 Gy	0	0	0	0	0	0	0	0	0	No handicap	No handicap	No handicap	Absent	Absent	Absent	Absent
23	Murthy	636914f	65	61-70	Male	55	140		Central	High school certificate	Unemployed		Tamil nadu	SCC	Nasopharynx		3	N0	III	Radical RT				70	70	52.6	73	66.6	67	45	41-45 Gy	44.5	41-45 Gy	0	0	0	0	0	0	0	0	0	No handicap	No handicap	No handicap	Absent		Absent
24	Ashok das	964001h	43	41-50	Male	70	167		Left	Intermediate or post high school diploma	Skilled worker	7596976263	West Bengal	SCC	oral cavity		3	N2c	IV	WLE + SND	3	N2b	IV	60	60	27.3	66.8	60.6	60.7	5.53	6-10 Gy	4.43	<5 Gy	0	0	0	0	0	0	0	0	0	No handicap	No handicap	No handicap	Absent	Absent	Absent	Absent
25	Basudeo marandi	952290h	49	41-50	Male	65	174		Right	Professional degree	Professional (white collar)	9931997468	Jharkhand	SCC	oral cavity		4	N1	IV	WLE + MRND	4	N0	IV	60	60	41.2	66.3	60.8	61	19.8	16-20 Gy	36.3	36-40 Gy	0	0	0	0	0	0	0	0	0	No handicap	No handicap	No handicap	Absent		Absent
26	Monawarul	954611h	43	41-50	Male	53	162		Right	Intermediate or post high school diploma	Semi-professional	9859214252	Assam	SCC	hypophraynx		3	N0	III	WLE + SLND	3	N0	III	66	66	41.2	72.5	67.5	67.6	20.1	21-25 Gy	8.87	6-10 Gy	0	0	0	0	0	0	0	0	0	No handicap	No handicap	No handicap	Absent	Absent	Absent	Absent
27	Krishnamoorthy	956167h	70	61-70	Male	50	142		Right	Intermediate or post high school diploma	Unemployed	9789537493	Tamil Nadu	ACC	Sinonasal		3	N0	III	WLE + SND	3	N0	III	60	60	46.5	67	61.3	61.5	38.4	36-40 Gy	24.7	21-25 Gy	0	4	6	0	6	6	0	10	12	No handicap	Mild-moderate handicap	Mild-moderate handicap	Mild-moderate handicap	Absent	Absent	Absent
28	Veeramani	888292H	66	61-70	Male	63	168		Right	Intermediate or post high school diploma	Clerical, shop-owner/farm	9488205566	Tamil nadu	SCC	oral cavity		2	N1	III	WLE + MRND	2	N1	III	60	60	46	66.4	60.9	61.2	34.2	31-35 Gy	18.8	16-20 Gy	0	4	6	0	8	8	0	12	14	No handicap	Mild-moderate handicap	Mild-moderate handicap	Absent	Absent	Absent	Absent
29	Narayanswamy	965660H	64	61-70	Male	59	158		Right	Graduate or postgraduate	Unemployed	9842362999	Tamil Nadu	SCC	hypophraynx		4	N0	IV	WLE + SND	3	N0	III	60	60	27.3	66.3	60.9	61	2.73	<5 Gy	2.92	<5 Gy	0	0	0	0	0	0	0	0	0	No handicap	No handicap	No handicap	Absent	Absent	Absent	Absent
30	Santa	070722D	76	>70	Female				right	Middle school certificate	Unskilled worker	9435033564	Assam	SCC	hypophraynx		4	N0	IV	Radical RT				70	70	50.5	76.6	70.9	71	18.6	16-20 Gy	20.1	21-25 Gy	0	0	0	0	0	0	0	0	0	No handicap	No handicap	No handicap	Absent		Absent
31	SITANATH HALDER	956015H	43	41-50	Male	73	162		Right	Graduate or postgraduate	Professional (white collar)	629703395	West bengal	Mucoepidermal ca	oral cavity		4	N0	IV	WLE + SND	4	N0	IV	60	60	49.4	67.4	60.6	60.6	15.4	16-20 Gy	20.4	21-25 Gy	0	0	0	0	0	0	0	0	0	No handicap	No handicap	No handicap	Absent	Absent	Absent	Absent
32	Intilema	954685H	40	30-40	Female	72	158		Left	Graduate or postgraduate	Semi-professional	8413991928	Nagaland	Lymphoepithelial CA	oral cavity		1	N0	I	WLE	1	N0	I	60	60	41.2	68.8	62	61.9	27.1	26-30 Gy	7.1	6-10 Gy	0	0		0	0		0	0		No handicap	No handicap		Absent		Absent
33	Arun	856176H	44	41-50	Male	58	159		Right	Graduate or postgraduate	Clerical, shop-owner/farm	9083686371	West bengal	Sinonasal synovial sarcoma	Nasopharynx		3	N3b	IV	WLE + MRND	3	N3b	IV	60	60	46	65.6	60.2	60.5	34.7	31-35 Gy	40	41-45 Gy	0	0	0	0	0	0	0	0	0	No handicap	No handicap	No handicap	Absent	Absent	Absent	Absent
34	Jaswant kumar	000219P	38	30-40	Male	76	16		Right	Graduate or postgraduate	Semi-professional	9435598065	Jharkhand	Secretory ca	Parotid		4	N2b	IV	WLE + RND	3	N0	III	60	60	46.6	65.2	61.5	61.8	13	11-15 Gy	35.4	36-40 Gy	0	0		0	0		0	0		No handicap	No handicap		Absent		Absent
35	Shyamji	959819h	46	41-50	Male	69	170		Left	High school certificate	Unskilled worker	8724828684	Assam	SCC	oral cavity		4	N0	III	WLE + SND	3	N0	III	60	60	27.3	65.8	60.9	60.9	41.9	41-45 Gy	20.7	21-25 Gy	0	4	6	0	6	6	0	10	12	No handicap	Mild-moderate handicap	Mild-moderate handicap	Absent	Absent	Absent	Absent
36	Banupada	013144p	69	61-70	Male	67	171		Right	Graduate or postgraduate	Professional (white collar)	9734627731	West Bengal	SCC	oral cavity		3	N1	III	WLE + SLND	3	N0	III	60	60	47.5	65	61	61.3	3.9	<5 Gy	3.8	<5 Gy	0	0	0	0	0	0	0	0	0	No handicap	No handicap	No handicap	Absent	Absent	Absent	Absent
37	Nitish	960869h	40	30-40	Male	86	182		Left	Graduate or postgraduate	Semi-professional	9163975506	West Bengal	SCC	oral cavity		4	N3b	IV	WLE + MRND	4	N3b	IV	66	66	27.3	74.3	66.8	66.7	28.4	26-30 Gy	38.2	36-40 Gy	0	0	0	0	0	0	0	0	0	No handicap	No handicap	No handicap	Absent		Absent
38	Sharwan	003218p	35	30-40	Male	82	169		Left	Intermediate or post high school diploma	Semi-skilled worker	9903261795	West Bengal	SCC	oral cavity		4	N1	IV	WLE + MRND	3	N0	III	60	60	52.3	66.5	61.3	61.1	42	41-45 Gy	21.5	21-25 Gy	0	4	4	0	6	4	0	10	8	No handicap	Mild-moderate handicap	Mild-moderate handicap	Absent	Absent	Absent	Absent
39	Paramananda	021346p	55	51-60	Male	51	174		Left	Intermediate or post high school diploma	Semi-skilled worker	8789801278	West Bengal	SCC	hypophraynx		3	N2b	III	Radical RT				70	70	56.1	75.8	70.8	71.2	17.9	16-20 Gy	19.4	16-20 Gy	0	6	8	0	8	8	0	14	16	No handicap	Mild-moderate handicap	Mild-moderate handicap	Absent	Absent	Absent	Absent
40	Shambhunath	958482h	56	51-60	Male	81	168		Left	High school certificate	Skilled worker	9635821296	West Bengal	Verrucous CA	oral cavity		3	N1	III	WLE + RND	3	N0	III	60	60	27.3	66.5	61.1	60.9	40.6	41-45 Gy	18.5	16-20 Gy	0	4	4	0	4	4	0	8	8	No handicap	Mild-moderate handicap	Mild-moderate handicap	Absent	Absent	Absent	Absent
41	Chittaranjan	959855h	57	51-60	Male	55	160		Right	Intermediate or post high school diploma	Semi-skilled worker	9064684186	west Bengal	SCC	oral cavity		4	N0	IV	WLE + SND	4	N0	IV	66	66	27.3	72.3	67.4	67.4	14.1	11-15 Gy	33.1	31-35 Gy	0			0			0			No handicap			Absent		Absent
42	Malari de	011870p	46	41-50	Female	60	160		Right	Intermediate or post high school diploma	Unemployed	9830890333	West Bengal	SCC	oral cavity		2	N0	II	WLE + SND	4	N2b	IV	60	60	43.1	66.1	61.3	61.8	16.1	16-20 Gy	13.2	11-15 Gy	0	0	0	0	0	0	0	0	0	No handicap	No handicap	No handicap	Absent	Absent	Absent	Absent
43	Karunnahar	019496p	57	51-60	Female	48	147		Right	High school certificate	Unemployed		Bangladesh	SCC	hypophraynx		2	N0	II	Radical RT				70	70	60	75.4	70.5	70.6	15	16-20 Gy	15	16-20 Gy	0	0	0	0	0	0	0	0	0	No handicap	No handicap	No handicap	Absent		Absent
44	P j Pauline	908086f	78	>70	Female	57	147		Left	Graduate or postgraduate	Unemployed	9880369001	Karnataka	PTC	Thyroid		3	N0	II	Radical RT				66	66	41.2	71.8	67.6	67.7	19.6	16-20 Gy	24	21-25 Gy	0	0	0	0	0	0	0	0	0	No handicap	No handicap	No handicap	Absent		Absent
45	MD nurul Hossain	923367h	52	51-60	Male	79	178		Right	Intermediate or post high school diploma	Semi-skilled worker	9500173742	Bangladesh	ACC	Parotid		unknown	N0	unknown	WLE (outside)				60	60	41.2	67.1	60.4	60.6	6.6	6-10 Gy	20	21-25 Gy	0	0	0	0	0	0	0	0	0	No handicap	No handicap	No handicap	Absent	Absent	Absent	Absent
[truncated: 81 more columns]

## Sheet: Working file_Updated
1_Study_number	3_Name	4_Hospital_number		5_Age	Age group	6_Sex	7_Weight	8_Height	BMI	side	Education	Occupation	11_Phone_number	Address	14_Histopath	15_site	16_Other_site	17_Initial_T_stage	Initial_N_staging	Stage_group	Prior_oncological	21_Surgical_T_stage	Surgical_N_staging	Surgical_Stage	25_Dose_to_the_PTV	25_Dose_to_the_PTV	Dmin	Dmax	Mean	median	26_Dose_to_the_Left_	Group left cochlea	27_Dose_to_the_Right	Group right cochlea	29_Social_score_at_B	30_Social_score_at_3	31_Social_score_at_6	32_Emotional_score_B	33_Emotional_score_3	34_Emotional_score_6	35_Total_score_at_B	36_Total_score_at_3_	37_Total_score_at_6	38_QOL_group_at_base	39_QOL_group_at_3_mo	40_QOL_group_at_6_mo	Side	PTA_B	PTA_3
1	MD Abu selim	798175h		53	51-60	Male	74	159		Left	Graduate or postgraduate	Professional (white collar)	9566392936	Bangladesh	Mucoepidermoid	Parotid		2	N0	II	WLE	2	N0	II	60	60	44.4	66.5	60.9	61.5	37.6	36-40 Gy	9.4	6-10 Gy	0	8	6	0	6	4	0	14	10	No handicap	Mild-moderate handicap	Mild-moderate handicap	Ipsilateral	Normal
2	Irfan haider	838037H		41	41-50	Male	74	160		Right	Graduate or postgraduate	Semi-professional	9334709541	Jharkhand	Squamous cell carcinoma	Parotid		2	N0	II	WLE	2	N0	II	60	60	46	66.3	61.6	61.7	14	11-15 Gy	45	41-45 Gy	0	0	0	0	0	0	0	0	0	No handicap	No handicap	No handicap	Ipsilateral	Normal	Normal
3	Rahul barman	804470H		37	30-40	Male	70	168		Right	High school certificate	Skilled worker	963088445	Chhattisgarh	SCC	oral cavity		2	N0	II	WLE + MRND	2	N1	III	60	60	44.4	65.4	61	61.3	40.1	41-45 Gy	14.8	11-15 Gy	0			0			0			No handicap			Ipsilateral	Normal
4	Siva Naga prakash	830541H		28	17-30	Male	78	175		Left	Graduate or postgraduate	Professional (white collar)	8592011645	Chennai	Mucoepidermoid	Parotid		1	N1	I	WLE + SLND	4	N2b	IV	66	66	46	66.3	61.6	61.4	41.6	41-45 Gy	6.07	6-10 Gy	0	0	0	0	0	0	0	0	0	No handicap	No handicap	No handicap	Ipsilateral	Normal	Normal
5	Raveendran	892928h		55	51-60	Male	75	164		Right	Graduate or postgraduate	Professional (white collar)	9751669630	Tamil nadu	SCC	oral cavity		3	N2c	IV	WLE + MRND	3	N2c	IV	60	60	43.7	66.4	61	61.3	11.4	11-15 Gy	7.5	6-10 Gy	0	0	0	0	0	0	0	0	0	No handicap	No handicap	No handicap	Ipsilateral	Normal	Normal
6	Veeramani	888292H		66	61-70	Male	63	168		Right	Intermediate or post high school diploma	Clerical, shop-owner/farm	9488205566	Tamil nadu	SCC	oral cavity		2	N1	III	WLE + MRND	2	N1	III	60	60	46	66.4	60.9	61.2	34.2	31-35 Gy	18.8	16-20 Gy	0			0			0			No handicap			Ipsilateral	Normal
7	Jayachandra	889734H		63	61-70	Male	67	164		Left	Graduate or postgraduate	Semi-professional	9902279866	TAMIL NADU	SCC	Sinonasal		4	N2a	IV	WLE + SLND	4	N0	III	60	60	43.7	68.3	61.1	61.1	39.6	36-40 Gy	27.7	26-30 Gy	0	4	4	0	4	2	0	8	6	No handicap	No handicap	No handicap	Ipsilateral	Normal	Conductive
8	Kalavathy	182262A		69	61-70	Female	52	147		Right	High school certificate	Unemployed	8098656304	Tamil nadu	SCC	oral cavity		4	N2c	IV	WLE + SLND	4	N0	IV	60	60	47.8	66.4	60.5	60.6	45	41-45 Gy	10.5	11-15 Gy	0	8	8	0	4	2	0	12	10	No handicap	Mild-moderate handicap	Mild-moderate handicap	Ipsilateral	Normal	Mixed
9	Santosh keshri	894251H		48	41-50	Male	76	178		Right	High school certificate	Skilled worker	6203026212	Bihar	SCC	oral cavity		3	N1	III	WLE + SND	3	N2b	III	60	60	46.8	65.7	60.6	60.7	12.2	11-15 Gy	6.25	6-10 Gy	0	0	0	0	0	0	0	0	0	No handicap	No handicap	No handicap	Ipsilateral	Normal	Normal
10	Poomoni sulochana	970914C		57	51-60	Female	55	145		Right	High school certificate	Unemployed	8760017162	Tamil Nadu	SCC	Sinonasal		3	N2b	IV	WLE + MRND	3	N2b	IV	66	60	27.3	66.6	61.2	61.6	15.2	16-20 Gy	44.7	41-45 Gy	0	4		0	6		0	10		No handicap	Mild-moderate handicap		Ipsilateral	Normal	Mixed
11	Ramakant Tiwari	897231H		54	51-60	Male	60	174		Left	Intermediate or post high school diploma	Skilled worker	626660675	Chhattisgarh	SCC	oral cavity		4	N0	IV	WLE + MRND	4	N0	IV	66	66	41.2	66.5	61.1	61.2	44.8	41-45 Gy	24.1	21-25 Gy	0	2	2	0	2	2	0	4	4	No handicap	No handicap	No handicap	Ipsilateral	Normal	Conductive
12	Vijayan	513810B		54	51-60	Male	70	170		Right	Graduate or postgraduate	Professional (white collar)	9488889022	Tamil Nadu	SCC	oral cavity		4	N2b	IV	WLE + SLND	4	N2b	IV	60	60	38.2	66.3	58.8	60.2	10.2	11-15 Gy	17.3	16-20 Gy	0	0		0	0		0	0		No handicap	No handicap		Ipsilateral	Normal
13	Manimegalai	955832H		51	51-60	Male	75	152		Left	Graduate or postgraduate	Professional (white collar)	9443005787	Tamil Nadu	SCC	oral cavity		2	N0	II	WLE + SND	3	N0	III	60	60	41.2	66.6	61	61.1	16.6	16-20 Gy	19.4	16-20 Gy	0	0	0	0	0	0	0	0	0	No handicap	No handicap	No handicap	Ipsilateral	Normal	Normal
14	Anil Kumar	238875G		46	41-50	Male	88	182		Right	Graduate or postgraduate	Clerical, shop-owner/farm	8220861761	Jharkhand	SCC	oral cavity		4	N0	IV	WLE	4	N0	IV	60	60	27.5	66.8	60.5	60.8	20.3	21-25 Gy	9	6-10 Gy	0	0	0	0	0	0	0	0	0	No handicap	No handicap	No handicap	Ipsilateral	Normal	Normal
15	Rajendra prasad	233805B		59	51-60	Male	85	173		Left	Intermediate or post high school diploma	Clerical, shop-owner/farm		Andhra Pradesh	Clear cell carcinoma	Sinonasal		3	N0	III	WLE	3	N0	III	66	66	42	67.6	60.2	60.4	35.4	36-40 Gy	29.2	26-30 Gy	0	0	0	0	0	0	0	0	0	No handicap	No handicap	No handicap	Ipsilateral	Normal	Normal
16	MD shamim akter	231380G		46	41-50	Male	55	175		Left	Intermediate or post high school diploma	Clerical, shop-owner/farm	6203015438	West bengal	SCC	Orophraynx		3	N0	III	WLE	3	Nx	III	60	60	46.4	64.1	60.2	60.6	6.9	6-10 Gy	8.9	6-10 Gy	0	0	0	0	0	0	0	0	0	No handicap	No handicap	No handicap	Ipsilateral	Normal	Conductive
17	Rosa	022834D		67	61-70	Female	46	155		Right	Intermediate or post high school diploma	Unemployed	9436100616	Meghalaya	SCC	hypophraynx		4	N3b	IV	Radical RT	4	N3b	IV	70	70	52	76.5	71.2	71.5	12.8	11-15 Gy	21.2	21-25 Gy	0	8	8	0	4	4	0	12	12	No handicap	Mild-moderate handicap	Mild-moderate handicap	Ipsilateral	Normal	Mixed
18	Kancharla Srinivas roa	894341H		38	30-40	Male	80	160		Right	Intermediate or post high school diploma	Clerical, shop-owner/farm	9704266121	Andhra Pradesh	SCC	oral cavity		3	N3b	IV	WLE + MRND	3	N1	III	60	60	41.2	66.7	60.9	61.1	32.1	31-35 Gy	35.8	36-40 Gy	0	10	10	0	10	10	0	20	20	No handicap	Mild-moderate handicap	Mild-moderate handicap	Ipsilateral	Normal
19	MD bozlur	967021H		45	41-50	Male	69	162		Right	Graduate or postgraduate	Semi-professional	7477790109	Bangladesh	ACC	Sinonasal		unknown	N0	unknown	FESS (outside)				60	60	27.3	66.7	60.5	60.7	22.1	21-25 Gy	27.3	26-30 Gy	0	6	6	0	6	8	0	12	14	No handicap	Mild-moderate handicap		Ipsilateral	Normal
20	Paneerselvam	107567B		67	61-70	Male	102	183		Left	Intermediate or post high school diploma			Tamil nadu	SCC	oral cavity		4	N0	IV	WLE + MRND	4	N0	IV	60	60	41	66.5	60.6	60.8	38.7	36-40 Gy	23	21-25 Gy	0			0			0			No handicap			Ipsilateral	Normal
21	Suvankar santa	959326H		27	17-30	Male	53	168		Right	Intermediate or post high school diploma	Clerical, shop-owner/farm	7364918305	West bengal	Clear cell ca	Maxilla		4	N0	IV	WLE	4	Nx	IV	66	66	27.3	21.9	67.6	67.8	20.7	21-25 Gy	42.5	41-45 Gy	0	0	0	0	0	0	0	0	0	No handicap	No handicap	No handicap	Ipsilateral	Normal	Normal
22	Sofanath	956015H		43	41-50	Male	73	162		Right	Graduate or postgraduate	Professional (white collar)	629703395	West bengal	Mucoepidermal ca	oral cavity		4	N0	IV	WLE + SND	4	N0	IV	60	60	49.4	67.4	60.6	60.6	15.4	16-20 Gy	20.4	21-25 Gy	0	0	0	0	0	0	0	0	0	No handicap	No handicap	No handicap	Ipsilateral	Normal	Normal
23	Murthy	636914f		65	61-70	Male	55	140		Central	High school certificate	Unemployed		Tamil nadu	SCC	Nasopharynx		3	N0	III	Radical RT				70	70	52.6	73	66.6	67	45	41-45 Gy	44.5	41-45 Gy	0	0	0	0	0	0	0	0	0	No handicap	No handicap	No handicap	Ipsilateral	Normal
																																																Normal
24	Ashok das	964001h		43	41-50	Male	70	167		Left	Intermediate or post high school diploma	Skilled worker	7596976263	West Bengal	SCC	oral cavity		3	N2c	IV	WLE + SND	3	N2b	IV	60	60	27.3	66.8	60.6	60.7	5.53	6-10 Gy	4.43	<5 Gy	0	0	0	0	0	0	0	0	0	No handicap	No handicap	No handicap	Ipsilateral	Normal	Normal
25	Basudeo marandi	952290h		49	41-50	Male	65	174		Right	Professional degree	Professional (white collar)	9931997468	Jharkhand	SCC	oral cavity		4	N1	IV	WLE + MRND	4	N0	IV	60	60	41.2	66.3	60.8	61	19.8	16-20 Gy	36.3	36-40 Gy	0	0	0	0	0	0	0	0	0	No handicap	No handicap	No handicap	Ipsilateral	Normal
26	Monawarul	954611h		43	41-50	Male	53	162		Right	Intermediate or post high school diploma	Semi-professional	9859214252	Assam	SCC	hypophraynx		3	N0	III	WLE + SLND	3	N0	III	66	66	41.2	72.5	67.5	67.6	20.1	21-25 Gy	8.87	6-10 Gy	0	0	0	0	0	0	0	0	0	No handicap	No handicap	No handicap	Ipsilateral	Normal	Normal
27	Krishnamoorthy	956167h		70	61-70	Male	50	142		Right	Intermediate or post high school diploma	Unemployed	9789537493	Tamil Nadu	ACC	Sinonasal		3	N0	III	WLE + SND	3	N0	III	60	60	46.5	67	61.3	61.5	38.4	36-40 Gy	24.7	21-25 Gy	0	4	6	0	6	6	0	10	12	No handicap	Mild-moderate handicap	Mild-moderate handicap	Ipsilateral	Normal	Mixed
28	Veeramani	888292H		66	61-70	Male	63	168		Right	Intermediate or post high school diploma	Clerical, shop-owner/farm	9488205566	Tamil nadu	SCC	oral cavity		2	N1	III	WLE + MRND	2	N1	III	60	60	46	66.4	60.9	61.2	34.2	31-35 Gy	18.8	16-20 Gy	0	4	6	0	8	8	0	12	14	No handicap	Mild-moderate handicap	Mild-moderate handicap	Ipsilateral	Normal	Mixed
29	Narayanswamy	965660H		64	61-70	Male	59	158		Right	Graduate or postgraduate	Unemployed	9842362999	Tamil Nadu	SCC	hypophraynx		4	N0	IV	WLE + SND	3	N0	III	60	60	27.3	66.3	60.9	61	2.73	<5 Gy	2.92	<5 Gy	0	0	0	0	0	0	0	0	0	No handicap	No handicap	No handicap	Ipsilateral	Normal	Normal
30	Santa	070722D		76	>70	Female				right	Middle school certificate	Unskilled worker	9435033564	Assam	SCC	hypophraynx		4	N0	IV	Radical RT				70	70	50.5	76.6	70.9	71	18.6	16-20 Gy	20.1	21-25 Gy	0	0	0	0	0	0	0	0	0	No handicap	No handicap	No handicap	Ipsilateral	Normal
31	SITANATH HALDER	956015H		43	41-50	Male	73	162		Right	Graduate or postgraduate	Professional (white collar)	629703395	West bengal	Mucoepidermal ca	oral cavity		4	N0	IV	WLE + SND	4	N0	IV	60	60	49.4	67.4	60.6	60.6	15.4	16-20 Gy	20.4	21-25 Gy	0	0	0	0	0	0	0	0	0	No handicap	No handicap	No handicap	Ipsilateral	Normal	Normal
32	Intilema	954685H		40	30-40	Female	72	158		Left	Graduate or postgraduate	Semi-professional	8413991928	Nagaland	Lymphoepithelial CA	oral cavity		1	N0	I	WLE	1	N0	I	60	60	41.2	68.8	62	61.9	27.1	26-30 Gy	7.1	6-10 Gy	0	0		0	0		0	0		No handicap	No handicap		Ipsilateral	Normal
33	Arun	856176H		44	41-50	Male	58	159		Right	Graduate or postgraduate	Clerical, shop-owner/farm	9083686371	West bengal	Sinonasal synovial sarcoma	Nasopharynx		3	N3b	IV	WLE + MRND	3	N3b	IV	60	60	46	65.6	60.2	60.5	34.7	31-35 Gy	40	41-45 Gy	0	0	0	0	0	0	0	0	0	No handicap	No handicap	No handicap	Ipsilateral	Normal	Normal
34	Jaswant kumar	000219P		38	30-40	Male	76	16		Right	Graduate or postgraduate	Semi-professional	9435598065	Jharkhand	Secretory ca	Parotid		4	N2b	IV	WLE + RND	3	N0	III	60	60	46.6	65.2	61.5	61.8	13	11-15 Gy	35.4	36-40 Gy	0	0		0	0		0	0		No handicap	No handicap		Ipsilateral	Normal
35	Shyamji	959819h		46	41-50	Male	69	170		Left	High school certificate	Unskilled worker	8724828684	Assam	SCC	oral cavity		4	N0	III	WLE + SND	3	N0	III	60	60	27.3	65.8	60.9	60.9	41.9	41-45 Gy	20.7	21-25 Gy	0	4	6	0	6	6	0	10	12	No handicap	Mild-moderate handicap	Mild-moderate handicap	Ipsilateral	Normal	Sensorineural
36	Banupada	013144p		69	61-70	Male	67	171		Right	Graduate or postgraduate	Professional (white collar)	9734627731	West Bengal	SCC	oral cavity		3	N1	III	WLE + SLND	3	N0	III	60	60	47.5	65	61	61.3	3.9	<5 Gy	3.8	<5 Gy	0	0	0	0	0	0	0	0	0	No handicap	No handicap	No handicap	Ipsilateral	Normal	Normal
37	Nitish	960869h		40	30-40	Male	86	182		Left	Graduate or postgraduate	Semi-professional	9163975506	West Bengal	SCC	oral cavity		4	N3b	IV	WLE + MRND	4	N3b	IV	66	66	27.3	74.3	66.8	66.7	28.4	26-30 Gy	38.2	36-40 Gy	0	0	0	0	0	0	0	0	0	No handicap	No handicap	No handicap	Ipsilateral	Normal
38	Sharwan	003218p		35	30-40	Male	82	169		Left	Intermediate or post high school diploma	Semi-skilled worker	9903261795	West Bengal	SCC	oral cavity		4	N1	IV	WLE + MRND	3	N0	III	60	60	52.3	66.5	61.3	61.1	42	41-45 Gy	21.5	21-25 Gy	0	4	4	0	6	4	0	10	8	No handicap	Mild-moderate handicap	Mild-moderate handicap	Ipsilateral	Normal	Mixed
39	Paramananda	021346p		55	51-60	Male	51	174		Left	Intermediate or post high school diploma	Semi-skilled worker	8789801278	West Bengal	SCC	hypophraynx		3	N2b	III	Radical RT				70	70	56.1	75.8	70.8	71.2	17.9	16-20 Gy	19.4	16-20 Gy	0	6	8	0	8	8	0	14	16	No handicap	Mild-moderate handicap	Mild-moderate handicap	Ipsilateral	Normal	Mixed
40	Shambhunath	958482h		56	51-60	Male	81	168		Left	High school certificate	Skilled worker	9635821296	West Bengal	Verrucous CA	oral cavity		3	N1	III	WLE + RND	3	N0	III	60	60	27.3	66.5	61.1	60.9	40.6	41-45 Gy	18.5	16-20 Gy	0	4	4	0	4	4	0	8	8	No handicap	Mild-moderate handicap	Mild-moderate handicap	Ipsilateral	Normal	Mixed
41	Chittaranjan	959855h		57	51-60	Male	55	160		Right	Intermediate or post high school diploma	Semi-skilled worker	9064684186	west Bengal	SCC	oral cavity		4	N0	IV	WLE + SND	4	N0	IV	66	66	27.3	72.3	67.4	67.4	14.1	11-15 Gy	33.1	31-35 Gy	0			0			0			No handicap			Ipsilateral	Normal
42	Malari de	011870p		46	41-50	Female	60	160		Right	Intermediate or post high school diploma	Unemployed	9830890333	West Bengal	SCC	oral cavity		2	N0	II	WLE + SND	4	N2b	IV	60	60	43.1	66.1	61.3	61.8	16.1	16-20 Gy	13.2	11-15 Gy	0	0	0	0	0	0	0	0	0	No handicap	No handicap	No handicap	Ipsilateral	Normal	Normal
43	Karunnahar	019496p		57	51-60	Female	48	147		Right	High school certificate	Unemployed		Bangladesh	SCC	hypophraynx		2	N0	II	Radical RT				70	70	60	75.4	70.5	70.6	15	16-20 Gy	15	16-20 Gy	0	0	0	0	0	0	0	0	0	No handicap	No handicap	No handicap	Ipsilateral	Normal
44	P j Pauline	908086f		78	>70	Female	57	147		Left	Graduate or postgraduate	Unemployed	9880369001	Karnataka	PTC	Thyroid		3	N0	II	Radical RT				66	66	41.2	71.8	67.6	67.7	19.6	16-20 Gy	24	21-25 Gy	0	0	0	0	0	0	0	0	0	No handicap	No handicap	No handicap	Ipsilateral	Normal
45	MD nurul Hossain	923367h		52	51-60	Male	79	178		Right	Intermediate or post high school diploma	Semi-skilled worker	9500173742	Bangladesh	ACC	Parotid		unknown	N0	unknown	WLE (outside)				60	60	41.2	67.1	60.4	60.6	6.6	6-10 Gy	20	21-25 Gy	0	0	0	0	0	0	0	0	0	No handicap	No handicap	No handicap	Ipsilateral	Normal	Normal
[truncated: 27 more columns]

## Sheet: data available_29
1_Study_number	5_Age	Age group	6_Sex	7_Weight	8_Height	BMI	side	Education	Occupation	11_Phone_number	Address	14_Histopath	15_site	16_Other_site	17_Initial_T_stage	Initial_N_staging	Stage_group	Prior_oncological	21_Surgical_T_stage	Surgical_N_staging	Surgical_Stage	25_Dose_to_the_PTV	25_Dose_to_the_PTV	Dmin	Dmax	Mean	median	26_Dose_to_the_Left_	Group left cochlea	27_Dose_to_the_Right	Group right cochlea	29_Social_score_at_B	30_Social_score_at_3	31_Social_score_at_6	32_Emotional_score_B	33_Emotional_score_3	34_Emotional_score_6	35_Total_score_at_B	36_Total_score_at_3_	37_Total_score_at_6	38_QOL_group_at_base	39_QOL_group_at_3_mo	40_QOL_group_at_6_mo	I_Dmin	I_Dmin_C	I_Dmax	Code_I	I_Dmax_C	I_Dmean
1	41	41-50	Male	74	160		Right	Graduate or postgraduate	Semi-professional	9334709541	Jharkhand	Squamous cell carcinoma	Parotid		2	N0	II	WLE	2	N0	II	60	60	46	66.3	61.6	61.7	14	11-15 Gy	45	41-45 Gy	0	0	0	0	0	0	0	0	0	No handicap	No handicap	No handicap	39.8	36-40 Gy	51.8	2	41-45 Gy	45
2	28	17-30	Male	78	175		Left	Graduate or postgraduate	Professional (white collar)	8592011645	Chennai	Mucoepidermoid	Parotid		1	N1	I	WLE + SLND	4	N2b	IV	66	66	46	66.3	61.6	61.4	41.6	41-45 Gy	6.07	6-10 Gy	0	0	0	0	0	0	0	0	0	No handicap	No handicap	No handicap	30.2	31-35 Gy	53.4	2	41-45 Gy	41.6
3	55	51-60	Male	75	164		Right	Graduate or postgraduate	Professional (white collar)	9751669630	Tamil nadu	SCC	oral cavity		3	N2c	IV	WLE + MRND	3	N2c	IV	60	60	43.7	66.4	61	61.3	11.4	11-15 Gy	7.5	6-10 Gy	0	0	0	0	0	0	0	0	0	No handicap	No handicap	No handicap	22.4	21-25 Gy	44.6	2	41-45 Gy	32.8
4	63	61-70	Male	67	164		Left	Graduate or postgraduate	Semi-professional	9902279866	TAMIL NADU	SCC	Sinonasal		4	N2a	IV	WLE + SLND	4	N0	III	60	60	43.7	68.3	61.1	61.1	39.6	36-40 Gy	27.7	26-30 Gy	0	4	4	0	4	2	0	8	6	No handicap	No handicap	No handicap	35.7	36-40 Gy	44.9	2	41-45 Gy	39.6
5	69	61-70	Female	52	147		Right	High school certificate	Unemployed	8098656304	Tamil nadu	SCC	oral cavity		4	N2c	IV	WLE + SLND	4	N0	IV	60	60	47.8	66.4	60.5	60.6	45	41-45 Gy	10.5	11-15 Gy	0	8	8	0	4	2	0	12	10	No handicap	Mild-moderate handicap	Mild-moderate handicap	5.4	6-10 Gy	16.8	1	16-20 Gy	10.5
6	48	41-50	Male	76	178		Right	High school certificate	Skilled worker	6203026212	Bihar	SCC	oral cavity		3	N1	III	WLE + SND	3	N2b	III	60	60	46.8	65.7	60.6	60.7	12.2	11-15 Gy	6.25	6-10 Gy	0	0	0	0	0	0	0	0	0	No handicap	No handicap	No handicap	4.5	<5 Gy	9.3	1	6-10 Gy	6.2
7	57	51-60	Female	55	145		Right	High school certificate	Unemployed	8760017162	Tamil Nadu	SCC	Sinonasal		3	N2b	IV	WLE + MRND	3	N2b	IV	66	60	27.3	66.6	61.2	61.6	15.2	16-20 Gy	44.7	41-45 Gy	0	4		0	6		0	10		No handicap	Mild-moderate handicap		42.3	41-45 Gy	48.1	2	41-45 Gy	44.7
8	54	51-60	Male	60	174		Left	Intermediate or post high school diploma	Skilled worker	626660675	Chhattisgarh	SCC	oral cavity		4	N0	IV	WLE + MRND	4	N0	IV	66	66	41.2	66.5	61.1	61.2	44.8	41-45 Gy	24.1	21-25 Gy	0	2	2	0	2	2	0	4	4	No handicap	No handicap	No handicap	37.3	36-40 Gy	52.2	2	41-45 Gy	44.8
9	51	51-60	Male	75	152		Left	Graduate or postgraduate	Professional (white collar)	9443005787	Tamil Nadu	SCC	oral cavity		2	N0	II	WLE + SND	3	N0	III	60	60	41.2	66.6	61	61.1	16.6	16-20 Gy	19.4	16-20 Gy	0	0	0	0	0	0	0	0	0	No handicap	No handicap	No handicap	11.3	11-15 Gy	23.5	1	21-25 Gy	16.6
10	46	41-50	Male	88	182		Right	Graduate or postgraduate	Clerical, shop-owner/farm	8220861761	Jharkhand	SCC	oral cavity		4	N0	IV	WLE	4	N0	IV	60	60	27.5	66.8	60.5	60.8	20.3	21-25 Gy	9	6-10 Gy	0	0	0	0	0	0	0	0	0	No handicap	No handicap	No handicap	29.7	26-30 Gy	39.9	2	36-40 Gy	34.7
11	59	51-60	Male	85	173		Left	Intermediate or post high school diploma	Clerical, shop-owner/farm		Andhra Pradesh	Clear cell carcinoma	Sinonasal		3	N0	III	WLE	3	N0	III	66	66	42	67.6	60.2	60.4	35.4	36-40 Gy	29.2	26-30 Gy	0	0	0	0	0	0	0	0	0	No handicap	No handicap	No handicap	17.9	16-20 Gy	24.2	1	21-25 Gy	20.5
12	46	41-50	Male	55	175		Left	Intermediate or post high school diploma	Clerical, shop-owner/farm	6203015438	West bengal	SCC	Orophraynx		3	N0	III	WLE	3	Nx	III	60	60	46.4	64.1	60.2	60.6	6.9	6-10 Gy	8.9	6-10 Gy	0	0	0	0	0	0	0	0	0	No handicap	No handicap	No handicap	6.1	6-10 Gy	7.9	1	6-10 Gy	6.9
13	67	61-70	Female	46	155		Right	Intermediate or post high school diploma	Unemployed	9436100616	Meghalaya	SCC	hypophraynx		4	N3b	IV	Radical RT	4	N3b	IV	70	70	52	76.5	71.2	71.5	12.8	11-15 Gy	21.2	21-25 Gy	0	8	8	0	4	4	0	12	12	No handicap	Mild-moderate handicap	Mild-moderate handicap	12.7	11-15 Gy	32.7	2	31-35 Gy	21.2
14	27	17-30	Male	53	168		Right	Intermediate or post high school diploma	Clerical, shop-owner/farm	7364918305	West bengal	Clear cell ca	Maxilla		4	N0	IV	WLE	4	Nx	IV	66	66	27.3	21.9	67.6	67.8	20.7	21-25 Gy	42.5	41-45 Gy	0	0	0	0	0	0	0	0	0	No handicap	No handicap	No handicap	40	41-45 Gy	45	2	41-45 Gy	42.5
15	43	41-50	Male	73	162		Right	Graduate or postgraduate	Professional (white collar)	629703395	West bengal	Mucoepidermal ca	oral cavity		4	N0	IV	WLE + SND	4	N0	IV	60	60	49.4	67.4	60.6	60.6	15.4	16-20 Gy	20.4	21-25 Gy	0	0	0	0	0	0	0	0	0	No handicap	No handicap	No handicap	15.5	16-20 Gy	25.6	2	26-30 Gy	20.4
16	43	41-50	Male	70	167		Left	Intermediate or post high school diploma	Skilled worker	7596976263	West Bengal	SCC	oral cavity		3	N2c	IV	WLE + SND	3	N2b	IV	60	60	27.3	66.8	60.6	60.7	5.53	6-10 Gy	4.43	<5 Gy	0	0	0	0	0	0	0	0	0	No handicap	No handicap	No handicap	4.8	<5 Gy	6.3	1	6-10 Gy	5.5
17	43	41-50	Male	53	162		Right	Intermediate or post high school diploma	Semi-professional	9859214252	Assam	SCC	hypophraynx		3	N0	III	WLE + SLND	3	N0	III	66	66	41.2	72.5	67.5	67.6	20.1	21-25 Gy	8.87	6-10 Gy	0	0	0	0	0	0	0	0	0	No handicap	No handicap	No handicap	5.5	6-10 Gy	13.7	1	11-15 Gy	8.8
18	70	61-70	Male	50	142		Right	Intermediate or post high school diploma	Unemployed	9789537493	Tamil Nadu	ACC	Sinonasal		3	N0	III	WLE + SND	3	N0	III	60	60	46.5	67	61.3	61.5	38.4	36-40 Gy	24.7	21-25 Gy	0	4	6	0	6	6	0	10	12	No handicap	Mild-moderate handicap	Mild-moderate handicap	23.2	21-25 Gy	26	2	26-30 Gy	24.7
19	66	61-70	Male	63	168		Right	Intermediate or post high school diploma	Clerical, shop-owner/farm	9488205566	Tamil nadu	SCC	oral cavity		2	N1	III	WLE + MRND	2	N1	III	60	60	46	66.4	60.9	61.2	34.2	31-35 Gy	18.8	16-20 Gy	0	4	6	0	8	8	0	12	14	No handicap	Mild-moderate handicap	Mild-moderate handicap	12.5	11-15 Gy	26.4	2	26-30 Gy	18.8
20	64	61-70	Male	59	158		Right	Graduate or postgraduate	Unemployed	9842362999	Tamil Nadu	SCC	hypophraynx		4	N0	IV	WLE + SND	3	N0	III	60	60	27.3	66.3	60.9	61	2.73	<5 Gy	2.92	<5 Gy	0	0	0	0	0	0	0	0	0	No handicap	No handicap	No handicap	2.5	<5 Gy	3.5	1	<5 Gy	2.9
21	43	41-50	Male	73	162		Right	Graduate or postgraduate	Professional (white collar)	629703395	West bengal	Mucoepidermal ca	oral cavity		4	N0	IV	WLE + SND	4	N0	IV	60	60	49.4	67.4	60.6	60.6	15.4	16-20 Gy	20.4	21-25 Gy	0	0	0	0	0	0	0	0	0	No handicap	No handicap	No handicap	15.5	16-20 Gy	25.6	2	26-30 Gy	20.4
22	44	41-50	Male	58	159		Right	Graduate or postgraduate	Clerical, shop-owner/farm	9083686371	West bengal	Sinonasal synovial sarcoma	Nasopharynx		3	N3b	IV	WLE + MRND	3	N3b	IV	60	60	46	65.6	60.2	60.5	34.7	31-35 Gy	40	41-45 Gy	0	0	0	0	0	0	0	0	0	No handicap	No handicap	No handicap	24.5	21-25 Gy	35.5	2	36-40 Gy	28.4
23	46	41-50	Male	69	170		Left	High school certificate	Unskilled worker	8724828684	Assam	SCC	oral cavity		4	N0	III	WLE + SND	3	N0	III	60	60	27.3	65.8	60.9	60.9	41.9	41-45 Gy	20.7	21-25 Gy	0	4	6	0	6	6	0	10	12	No handicap	Mild-moderate handicap	Mild-moderate handicap	37.8	36-40 Gy	45.2	2	41-45 Gy	41.9
24	69	61-70	Male	67	171		Right	Graduate or postgraduate	Professional (white collar)	9734627731	West Bengal	SCC	oral cavity		3	N1	III	WLE + SLND	3	N0	III	60	60	47.5	65	61	61.3	3.9	<5 Gy	3.8	<5 Gy	0	0	0	0	0	0	0	0	0	No handicap	No handicap	No handicap	2.6	<5 Gy	3.8	1	<5 Gy	3.2
25	35	30-40	Male	82	169		Left	Intermediate or post high school diploma	Semi-skilled worker	9903261795	West Bengal	SCC	oral cavity		4	N1	IV	WLE + MRND	3	N0	III	60	60	52.3	66.5	61.3	61.1	42	41-45 Gy	21.5	21-25 Gy	0	4	4	0	6	4	0	10	8	No handicap	Mild-moderate handicap	Mild-moderate handicap	35.9	36-40 Gy	50.5	2	41-45 Gy	42
26	55	51-60	Male	51	174		Left	Intermediate or post high school diploma	Semi-skilled worker	8789801278	West Bengal	SCC	hypophraynx		3	N2b	III	Radical RT				70	70	56.1	75.8	70.8	71.2	17.9	16-20 Gy	19.4	16-20 Gy	0	6	8	0	8	8	0	14	16	No handicap	Mild-moderate handicap	Mild-moderate handicap	11.3	11-15 Gy	28.1	2	26-30 Gy	17.9
27	56	51-60	Male	81	168		Left	High school certificate	Skilled worker	9635821296	West Bengal	Verrucous CA	oral cavity		3	N1	III	WLE + RND	3	N0	III	60	60	27.3	66.5	61.1	60.9	40.6	41-45 Gy	18.5	16-20 Gy	0	4	4	0	4	4	0	8	8	No handicap	Mild-moderate handicap	Mild-moderate handicap	35.6	36-40 Gy	46.5	2	41-45 Gy	40.6
28	46	41-50	Female	60	160		Right	Intermediate or post high school diploma	Unemployed	9830890333	West Bengal	SCC	oral cavity		2	N0	II	WLE + SND	4	N2b	IV	60	60	43.1	66.1	61.3	61.8	16.1	16-20 Gy	13.2	11-15 Gy	0	0	0	0	0	0	0	0	0	No handicap	No handicap	No handicap	7.6	6-10 Gy	20.7	1	21-25 Gy	13.2
29	52	51-60	Male	79	178		Right	Intermediate or post high school diploma	Semi-skilled worker	9500173742	Bangladesh	ACC	Parotid		unknown	N0	unknown	WLE (outside)				60	60	41.2	67.1	60.4	60.6	6.6	6-10 Gy	20	21-25 Gy	0	0	0	0	0	0	0	0	0	No handicap	No handicap	No handicap	14.9	11-15 Gy	30.1	2	31-35 Gy	20.6
[truncated: 44 more columns]
